# Supplementary material for: Facile polyol synthesis of CuS nanocrystals with a hierarchical nanoplate structure and their application for electrocatalysis and photocatalysis
Source: Royal Society of Chemistry journal article supplement (doi:10.1039/c6ra17221k), 2016-01-01
Supplement: c6ra17221k1.pdf [file c6ra17221k1.pdf]

**Supporting Information for**

**Facile polyol synthesis of CuS nanocrystals with hierarchical nanoplate structure  
and their application for electrocatalysis and photocatalysis**

Wenlong Fu,<sup>a</sup> Maochang Liu,<sup>\*ab</sup> Fei Xue,<sup>a</sup> Xixi Wang,<sup>a</sup> Zhidan Diao<sup>a</sup> and Liejin  
Guo<sup>\*a</sup>

*<sup>a</sup>International Research Center for Renewable Energy, State Key Laboratory of  
Multiphase Flow in Power Engineering, Xi'an Jiaotong University, Xi'an, Shaanxi  
710049, P. R. China*

*<sup>b</sup>Xi'an Jiaotong University Suzhou Academy, Suzhou, Jiangsu 215123, P. R. China*

\*Corresponding Author.

Email: maochangliu@mail.xjtu.edu.cn (M.L.).

Email: lj-guo@mail.xjtu.edu.cn (L.G.)

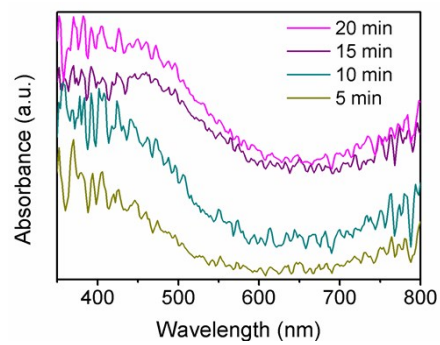

**Figure S1.** UV-vis absorption spectra of the as-prepared CuS nanocrystals with different reaction time.

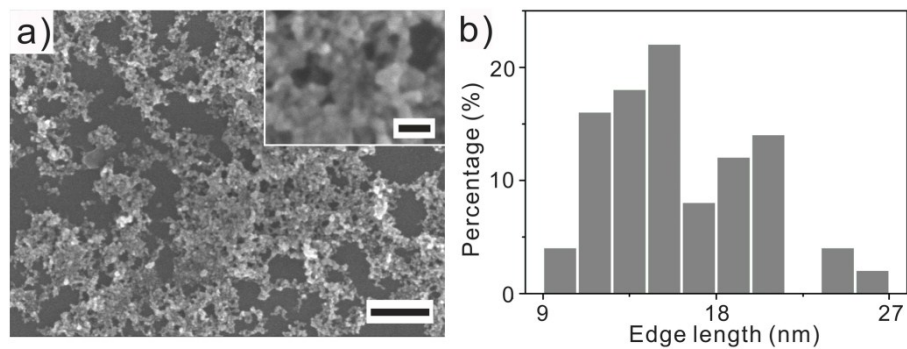

**Figure S2.** (a) FESEM images of CuS-Na<sub>2</sub>S nanocrystals. Scale bars in (a) and in the inset are 200 nm and 30 nm, respectively. (b) The corresponding histogram showing the size distribution of CuS-Na<sub>2</sub>S nanoparticles.
